# Supplementary material for: sTREM-1 predicts mortality in hospitalized patients with infection in a tropical, middle-income country
Source: PubMed Central journal article supplement (PMC7329452; doi:10.1186/s12916-020-01627-5), 2020-07-01
Supplement: 12916_2020_1627_MOESM1_ESM.pdf [file 12916_2020_1627_MOESM1_ESM.pdf]

## Additional file 1: Patient characteristics stratified by transfer status

| Characteristics                                    | Not transferred<br>(n=380) | Transferred<br>(n=380) |
|----------------------------------------------------|----------------------------|------------------------|
| Demographics                                       |                            |                        |
| Age in years, median (IQR)                         | 59 (36-72)                 | 60 (44-74)             |
| Male sex, N (%)                                    | 179 (47)                   | 222 (58)               |
| Pre-existing conditions                            |                            |                        |
| Charlson Comorbidity Index, median (IQR)           | 2 (0-4)                    | 2 (1-4)                |
| Diabetes, N (%)                                    | 79 (21)                    | 78 (21)                |
| Chronic liver disease, N (%)                       | 7 (2)                      | 11 (3)                 |
| Chronic kidney disease, N (%)                      | 39 (10)                    | 46 (12)                |
| Chronic cardiovascular disease, N (%)              | 25 (7)                     | 22 (6)                 |
| Chronic lung disease, N (%)                        | 32 (8)                     | 28 (7)                 |
| Cancer, N (%)                                      | 12 (3)                     | 5 (1)                  |
| HIV, N (%)                                         | 5 (1)                      | 4 (1)                  |
| Modified SOFA score, median (IQR)                  | 1 (0-3)                    | 4 (3-7)                |
| Subjects with modified SOFA score $\geq 2$ , N (%) | 166 (44)                   | 326 (86)               |
| Died within 28 days, N (%)                         | 40 (11)                    | 70 (18)                |
