# Supplementary material for: sTREM-1 predicts mortality in hospitalized patients with infection in a tropical, middle-income country
Source: PubMed Central journal article supplement (PMC7329452; doi:10.1186/s12916-020-01627-5), 2020-07-01
Supplement: 12916_2020_1627_MOESM2_ESM.pdf [file 12916_2020_1627_MOESM2_ESM.pdf]

## Additional file 2: Association of biomarkers with death stratified by transfer status

| Biomarker <sup>a</sup> | Transfer | Unadjusted        |                                     | Modified SOFA-adjusted <sup>c</sup> |                                     |
|------------------------|----------|-------------------|-------------------------------------|-------------------------------------|-------------------------------------|
|                        |          | OR<br>(95% CI)    | Interaction<br>p value <sup>b</sup> | OR<br>(95% CI)                      | Interaction<br>p value <sup>b</sup> |
| IL-8                   | No       | 2.8 (2.0-3.9)     | 0.16                                | 2.0 (1.3-3.1)                       | 0.24                                |
|                        | Yes      | 2.0 (1.6-2.6)     |                                     | 1.8 (1.3-2.4)                       |                                     |
| sTNFR-1                | No       | 46.2 (14.1-151.1) | 0.07                                | 6.1 (1.5-25.5)                      | 0.11                                |
|                        | Yes      | 11.5 (4.7-27.8)   |                                     | 4.1 (1.5-11.7)                      |                                     |
| Ang-1                  | No       | 1.1 (0.6-2.0)     | 0.84                                | 1.7 (0.7-4.0)                       | 0.63                                |
|                        | Yes      | 1.2 (0.8-1.9)     |                                     | 1.1 (0.7-1.9)                       |                                     |
| Ang-2                  | No       | 23.4 (9.2-59.7)   | 0.03                                | 6.0 (1.9-18.9)                      | 0.14                                |
|                        | Yes      | 6.6 (3.4-13.0)    |                                     | 4.2 (1.9-9.3)                       |                                     |
| Ang-2:Ang-1            | No       | 3.0 (1.8-4.8)     | 0.08                                | 1.4 (0.7-2.7)                       | 0.47                                |
|                        | Yes      | 1.7 (1.2-2.5)     |                                     | 1.4 (0.9-2.2)                       |                                     |
| sTREM-1                | No       | 56.5 (18.7-170.3) | 0.17                                | 11.1 (2.7-45.1)                     | 0.28                                |
|                        | Yes      | 20.5 (7.9-53.0)   |                                     | 9.3 (3.2-27.0)                      |                                     |

<sup>a</sup> Biomarkers were log<sub>10</sub> transformed before regression; the ORs (95% CI) of death reported are for each biomarker after stratification by transfer status

<sup>b</sup> p values for interaction of transfer status/set and biomarker were generated by a logistic regression model of death including biomarker, transfer status, and an interaction term.

<sup>c</sup> Models were adjusted for age, sex, Charlson Comorbidity Index, and modified SOFA score
