# Supplementary material for: sTREM-1 predicts mortality in hospitalized patients with infection in a tropical, middle-income country
Source: PubMed Central journal article supplement (PMC7329452; doi:10.1186/s12916-020-01627-5), 2020-07-01
Supplement: 12916_2020_1627_MOESM3_ESM.pdf [file 12916_2020_1627_MOESM3_ESM.pdf]

### Additional file 3: Association of Ang-2 with death stratified by transfer status

| Biomarker <sup>a</sup> | Transfer | Unadjusted      |         | Modified SOFA-adjusted <sup>b</sup> |         |
|------------------------|----------|-----------------|---------|-------------------------------------|---------|
|                        |          | OR<br>(95% CI)  | p value | OR<br>(95% CI)                      | p value |
| Ang-2                  | No       | 23.4 (9.2-59.7) | <0.001  | 6.0 (1.9-18.9)                      | <0.001  |
|                        | Yes      | 6.6 (3.4-13.0)  | <0.001  | 4.2 (1.9-9.3)                       | <0.001  |

<sup>a</sup> Biomarker was log<sub>10</sub> transformed before regression

<sup>b</sup> Models were adjusted for age, sex, Charlson Comorbidity Index, and modified SOFA score
