# Supplementary material for: sTREM-1 predicts mortality in hospitalized patients with infection in a tropical, middle-income country
Source: PubMed Central journal article supplement (PMC7329452; doi:10.1186/s12916-020-01627-5), 2020-07-01
Supplement: 12916_2020_1627_MOESM4_ESM.pdf [file 12916_2020_1627_MOESM4_ESM.pdf]

**Additional file 4: Adjustment and verification of sTREM-1 predictive models**

| <b>Model</b>                 | <b>AUC (95% CI)</b> | <b>Optimism-adjusted<br/>AUC (95% CI)<sup>a</sup></b> | <b>IDI<sup>b</sup></b> |
|------------------------------|---------------------|-------------------------------------------------------|------------------------|
| Clinical variables           | 0.79 (0.74-0.84)    | 0.79 (0.74-0.83)                                      | ref                    |
| sTREM-1                      | 0.81 (0.77-0.85)    | 0.81 (0.76-0.85)                                      | -                      |
| Clinical variables + sTREM-1 | 0.83 (0.79-0.87)    | 0.83 (0.79-0.87)                                      | 0.05 ± 0.01 P<0.001    |

<sup>a</sup> Optimism adjustment: bias correction based on 1000 x internal replication by bootstrapping

<sup>b</sup> IDI: Integrated discrimination improvement; values represent model improvement estimate of a clinical variable model with sTREM-1 over the clinical variable model alone ± standard error
