# Supplementary material for: sTREM-1 predicts mortality in hospitalized patients with infection in a tropical, middle-income country
Source: PubMed Central journal article supplement (PMC7329452; doi:10.1186/s12916-020-01627-5), 2020-07-01
Supplement: 12916_2020_1627_MOESM6_ESM.pdf [file 12916_2020_1627_MOESM6_ESM.pdf]

**Additional file 6: Net benefit of adding sTREM-1 to a model of clinical variables for mortality prediction**

| Probability of death (%) | Model net benefit <sup>a</sup> |            |                      |                             | Advantage of adding sTREM-1 to Clinical Variable model                      |                                                                                |
|--------------------------|--------------------------------|------------|----------------------|-----------------------------|-----------------------------------------------------------------------------|--------------------------------------------------------------------------------|
|                          | Predict all die                | Clin. Var. | Clin. Var. + sTREM-1 | Advantage of adding sTREM-1 | Increase in number correctly predicted to die per 100 patients <sup>b</sup> | Reduction in number incorrectly predicted to die per 100 patients <sup>c</sup> |
| 5                        | 0.100                          | 0.107      | 0.109                | 0.003                       | 0.2                                                                         | 4.9                                                                            |
| 10                       | 0.050                          | 0.077      | 0.089                | 0.012                       | 1.0                                                                         | 11.2                                                                           |
| 15                       | -0.006                         | 0.065      | 0.076                | 0.011                       | 0.5                                                                         | 6.1                                                                            |
| 20                       | -0.069                         | 0.042      | 0.058                | 0.016                       | 1.4                                                                         | 6.3                                                                            |
| 25                       | -0.141                         | 0.042      | 0.043                | 0.001                       | -0.4                                                                        | 0.4                                                                            |
| 30                       | -0.222                         | 0.028      | 0.034                | 0.005                       | -0.4                                                                        | 1.2                                                                            |

<sup>a</sup> Model benefit derived from ((true-positive count/N)-(false-positive count/N)(probability of death/1- probability of death))

<sup>b</sup> Increase in number correctly predicted to die per 100 patients for each model calculated as: (net benefit of the model – net benefit of assuming all patients will survive 28 days)/(probability of death/(1-probability of death))\*100). This number is net of false positive predictions of death.

<sup>c</sup> Reduction in number incorrectly predicted to die per 100 patients for each model calculated as: (net benefit of the model – net benefit of assuming all patients will die in 28 days)/(probability of death/(1-probability of death))\*100). This number is net of false negative predictions of death.
